# Supplementary material for: Hematodinium sp. infection does not drive collateral disease contraction in a crustacean host
Source: eLife. 2022 Feb 18;11:e70356. doi: 10.7554/eLife.70356 (PMC8856654; doi:10.7554/eLife.70356)
Supplement: Source data 1. [file elife-70356-data1.xlsx]

## Sheet: CFU_ALL
Hematodinium	Control
170	120
0	0
0	0
0	0
40	0
3460	0
0	0
0	0
50	10
10	10
10	10
0	0
0	0
4910	0
20	150
0	0
50	0
0	70
0	0
20	70
0	0
50	0
0	0
30	10
0	10
210	0
1470	20
0	50
10	10
0	0
0	0
0	0
0	10
0	50
0	240
0	0
0	0
0	0
0	0
0	60
30	0
20	10
0	40
10	10
30	20
0	20
10	0
10	0
0	10
10	70
10	760
10	0
0	10
20	10
0	0
0	390
0	20
40	70
0	30
0	20
40	0
0	0
60	80
0	30
80	10
10	80
0	10
60	10
630	40
0	30
0	880
0	10
40	0
60	0
120	30
40	40
20	40
20	0
140	0
0	30
0	0
30	30
280	20
0	0
	0
0	10
40	0
260	0
60	0
190	20
90	30
10	0
70	10
10	0
0	10
0	40
0	20
140	0
40	0
0	0
1740	0
0	0
0	0
0	0
0	0
30	0
0	0
70	0
70	0
640	0
0	0
10	0
0	0
10	0
0	10
0	0
10	0
0	20
0	0
0	0
0	0
10	0
0	0
0	0
0	0
1520	0
330	0
0	0
0	0
310	60
10	470
0	0
0	10
0	0
690	70
130	10
0	0
20	0
0	0
580	0
0	0
0	0
80	0
0	20
0	20
20	170
10	250
10	180
60	0
0	0
0	0
40	0
0	0
0	0
0	0
0	0
2210

## Sheet: CFU_DOCK
Hematodinium	Control
0	0
0	0
40	0
3460	0
0	0
0	0
0	0
4910	150
20	0
0	0
50	70
0	0
50	0
0	10
30	10
0	0
210	20
1470	50
0	10
0	0
0	0
0	60
0	0
30	10
20	40
0	10
10	20
30	20
0	0
0	0
40	0
0	80
60	30
0	10
80	80
120	0
40	30
20	40
20	40
140	0
0	0
0	30
30	0
280	30
190	0
90	20
10	30
70	0
10	10
0	0
0	10
0	0
0	0
0	0
30	0
0	0
70	0
70	0
640	0
0	0
10	0
0	0
10	0
0	0
0	20
0	0
10	0
0	0
0	0
0	0
690	0
130	70
0	10
20	0
0	0
0	20
20	20
10	170
40	0
0	0
0	0
0	0
0	0
2210	0

## Sheet: CFU_Pier
Hematodinium	Control
170	120
0	0
0	0
50	10
10	10
10	10
0	0
0	0
20	70
10	0
0	0
0	0
0	0
0	10
0	50
0	240
0	0
10	0
10	0
0	10
10	70
10	760
10	0
0	10
20	10
0	0
0	390
0	20
40	70
0	30
10	20
0	10
60	10
630	40
0	30
0	880
0	10
40	0
60	20
0	0
0	0
40	10
260	0
60	0
140	40
40	20
0	0
1740	0
0	0
0	0
0	10
10	0
0	0
0	0
1520	0
330	0
0	0
0	0
310	0
10	60
0	470
0	0
0	10
580	0
0	0
0	0
80	0
0	0
10	250
60	180
0	0
0	0

## Sheet: Co-infection_Overview
	Co-infection	no co-infection			ALL
Hematodinium	40	122
Control	38	124
Hematodinium	24	63			DOCK
Control	18	69
Hematodinium	16	59			PIER
Control	20	55

## Sheet: Composition_Overview
	Hematodinium	Haplosporidia	Microsporidia	Mikrocytids	Paramyxids	Vibrio spp.	Fungal species	Sacculina	Trematodes		ALL
Hematodinium	0	2	1	0	0	4	2	21	12
Control	0	3	0	0	0	1	2	17	15
Hematodinium	0	0	1	0	0	3	0	21	0		DOCK
Control	0	0	0	0	0	1	0	17	0
Hematodinium	0	2	0	0	0	1	2	0	12		PIER
Control	0	3	0	0	0	0	2	0	15
		Dock	versus	Pier
	Haplosporidia	Microsporidia	Vibrio spp.	Fungal species	Sacculina	Trematodes
Dock	0	1	4	0	38	0
Pier	5	0	1	4	0	27

## Sheet: SIZE_COINFECTION_ALL
Co-infection	No co-infection
45.7	41.6
38.6	46.2
49	40.4
42.9	43.9
43.2	42.7
45.2	49.4
39.3	46.3
42	57.4
44.7	53.9
51	53.7
50	38.5
61.3	58.4
38.7	43.7
39.7	48.3
47.2	42.1
55.3	50.3
43.4	49.2
55.6	44
36.8	43
48.9	48.7
49.1	61.8
52.5	65.6
50.3	45
51.9	44.9
40.3	40
69	44.2
43.4	37.6
55.6	49
38.5	41
44.5	48
50.8	47.9
46	49.7
50	42.2
44.8	66.5
47	51
54.4	45
41.2	52
55.6	44
42.7	45
40.4	64.6
43.8	64.4
33	52
44.5	42
47.2	50
38.8	42
78.6	43
70	52.4
48.9	46.3
61	45.5
65	38.5
50	46.6
59.4	51.7
48.7	45
41	46.9
53	42.4
36	42.4
43	41.7
40	36
48	46.9
16.9	42.2
46	38
39	55.8
41.5	39
41.8	63
19	50
25	60
36	73
48	76
44.6	59.5
47.3	43.2
43.8	49
46	50
35	52.8
36	56.6
39	45.1
46	63
46	33.6
75	50.5
	49.1
	49.8
	41.6
	44.2
	38.4
	42.6
	42.9
	47.3
	45.7
	37.6
	37.7
	36.3
	35.2
	47.2
	36.1
	50.8
	36.2
	35.9
	45.5
	44.2
	54
	49.2
	38.2
	53
	48
	67
	52.2
	48.1
	42.8
	52.2
	40.4
	36.6
	34.6
	36.4
	34.7
	33.6
	48.7
	49.1
	53.1
	52.3
	38.8
	68.5
	72.4
	42
	51
	55
	46
	48.4
	71
	50.2
	78
	53.9
	44.9
	41.8
	37.1
	33.5
	43
	41.5
	47.5
	48.8
	48.5
	65.5
	66.2
	45.9
	54.3
	44.2
	75.9
	47.3
	48.1
	44.5
	49.1
	33.9
	72.7
	49.8
	45.1
	49.8
	42.1
	42.7
	42.8
	41
	51.4
	46.5
	43.2
	44
	44
	50.5
	51.8
	65.4
	62.1
	50.1
	66
	65.8
	61.3
	61.8
	47
	76
	51
	49
	52
	61
	66.3
	47.3
	47.1
	54
	40
	40
	18
	47
	44.7
	68.6
	56
	68.6
	66
	48
	76
	72
	66
	50.6
	42.7
	45
	38.6
	44.02
	42
	41.3
	41.6
	42
	41.8
	44.3
	41.4
	48.5
	46.4
	41
	38.5
	37
	71
	75
	65
	38
	65
	58
	51
	52
	55
	44
	46.3
	43
	61
	66
	34
	60
	33
	57
	50
	40
	46
	50
	46
	73
	59
	55
	58
	75
	58
	60
	55
	66
	65
	75

## Sheet: SIZE_COINFECTION_Hematodinium
Co-infection	No co-infection
38.6	46.2
42.9	40.4
43.2	42.7
45.2	49.4
44.7	53.7
51	58.4
50	48.3
47.2	42.1
55.3	50.3
55.6	44
48.9	61.8
52.5	40
51.9	37.6
40.3	49
69	47.9
50.8	42.2
46	51
50	45
44.8	64.6
55.6	64.4
42.7	42
40.4	43
44.5	46.3
47.2	46.6
65	51.7
50	45
48.7	42.4
36	41.7
43	36
16.9	38
39	39
41.5	50
19	73
44.6	59.5
47.3	43.2
43.8	52.8
35	63
39	33.6
46	49.8
75	41.6
	38.4
	42.6
	47.3
	37.6
	35.2
	50.8
	36.2
	45.5
	54
	49.2
	53
	42.8
	40.4
	36.6
	36.4
	48.7
	53.1
	52.3
	38.8
	72.4
	51
	46
	50.2
	78
	37.1
	33.5
	41.5
	47.5
	66.2
	45.9
	54.3
	44.2
	49.1
	72.7
	42.1
	42.7
	41
	51.4
	44
	44
	50.5
	62.1
	65.8
	61.3
	76
	49
	52
	61
	66.3
	47.3
	54
	40
	44.7
	68.6
	56
	68.6
	48
	76
	50.6
	42.7
	38.6
	44.02
	42
	46.4
	41
	37
	71
	38
	65
	52
	55
	46.3
	61
	60
	33
	50
	46
	58
	60
	55
	66
	75

## Sheet: SIZE_COINFECTION_Control
Co-infection	No co-infection
45.7	41.6
49	43.9
39.3	46.3
42	57.4
61.3	53.9
38.7	38.5
39.7	43.7
43.4	49.2
36.8	43
49.1	48.7
50.3	65.6
43.4	45
55.6	44.9
38.5	44.2
44.5	41
47	48
54.4	49.7
41.2	66.5
43.8	45
33	52
38.8	44
78.6	52
70	50
48.9	42
61	52.4
59.4	45.5
41	38.5
53	46.9
40	42.4
48	46.9
46	42.2
41.8	55.8
25	63
36	60
48	76
46	49
36	50
46	56.6
	45.1
	50.5
	49.1
	44.2
	42.9
	45.7
	37.7
	36.3
	47.2
	36.1
	35.9
	44.2
	38.2
	48
	67
	52.2
	48.1
	52.2
	34.6
	34.7
	33.6
	49.1
	68.5
	42
	55
	48.4
	71
	53.9
	44.9
	41.8
	43
	48.8
	48.5
	65.5
	75.9
	47.3
	48.1
	44.5
	33.9
	49.8
	45.1
	49.8
	42.8
	46.5
	43.2
	51.8
	65.4
	50.1
	66
	61.8
	47
	51
	47.1
	40
	18
	47
	66
	72
	66
	45
	42
	41.3
	41.6
	41.8
	44.3
	41.4
	48.5
	38.5
	75
	65
	58
	51
	44
	43
	66
	34
	57
	40
	46
	50
	73
	59
	55
	75
	58
	65

## Sheet: CFU_Hematodinium
Co-infection	No co-infection
0	170
0	0
4910	0
0	40
50	3460
210	0
0	0
10	50
30	10
10	10
20	0
0	20
60	50
0	0
40	0
120	20
40	0
20	0
280	30
40	0
260	1470
90	0
0	10
0	0
10	0
0	0
0	0
0	0
310	0
580	0
0	0
80	0
0	0
0	0
0	30
2210	20
	0
	10
	10
	0
	10
	10
	0
	0
	0
	0
	40
	0
	0
	40
	80
	10
	0
	60
	630
	0
	0
	0
	60
	20
	140
	0
	0
	30
	0
	0
	60
	190
	10
	70
	10
	0
	0
	140
	40
	0
	1740
	0
	0
	0
	0
	30
	70
	70
	640
	0
	0
	10
	10
	0
	0
	0
	10
	0
	0
	0
	1520
	330
	0
	0
	10
	0
	0
	0
	690
	130
	0
	20
	0
	0
	0
	20
	10
	10
	60
	40
	0
	0
	0
	0

## Sheet: CFU_Control
Co-infection	No co-infection
0	120
0	0
0	0
0	0
50	0
240	0
10	10
20	10
0	10
0	0
0	0
10	0
40	150
30	70
0	0
40	70
30	0
0	0
10	0
0	10
0	10
0	0
0	20
0	10
0	0
0	0
10	0
0	10
20	50
0	0
60	0
70	0
0	0
0	60
0	0
0	40
	10
	20
	0
	10
	70
	760
	10
	10
	0
	390
	20
	70
	30
	20
	0
	80
	30
	10
	80
	10
	880
	10
	0
	30
	40
	0
	0
	30
	20
	0
	0
	0
	0
	20
	30
	0
	10
	0
	10
	40
	20
	0
	0
	0
	0
	0
	0
	0
	0
	0
	0
	0
	0
	0
	0
	0
	0
	0
	0
	0
	0
	0
	0
	470
	0
	10
	0
	10
	0
	0
	0
	0
	20
	20
	170
	250
	180
	0
	0
	0
	0
	0
	0
	0

[truncated: 4 more sheets: Composition_eDNA Overview, Composition analysus_Figure 5, COLOUR_Co-infection Overview, Salinity_Temperature]
